# Supplementary material for: Axin phosphorylation in both Wnt-off and Wnt-on states requires the tumor suppressor APC
Source: PubMed Central journal article supplement (PMC5800574; doi:10.1371/journal.pgen.1007178), 2018-02-06
Supplement: pgen.1007178.s006.pdf [file pgen.1007178.s006.pdf]

|                                      | Schematic of Drosophila Axin and mutants | Early stripes | ADP-ribosylated |
|--------------------------------------|------------------------------------------|---------------|-----------------|
| <b>Axin-V5</b>                       |                                          | Yes           | Yes             |
| <b>Axin<math>\Delta</math>TBD-V5</b> |                                          | No            | No              |
| <b>Axin<math>\Delta</math>RGS-V5</b> |                                          | No            | Yes             |
| <b>Axin<math>\Delta</math>ARM-V5</b> |                                          | Yes           | Yes             |
| <b>Axin<math>\Delta</math>PP2-V5</b> |                                          | No            | No              |
| <b>Axin<math>\Delta</math>DIX-V5</b> |                                          | No            | No              |
